# Supplementary material for: Predicting the impact of patient and private provider behavior on diagnostic delay for pulmonary tuberculosis patients in India: A simulation modeling study
Source: PLoS Med. 2020 May 14;17(5):e1003039. doi: 10.1371/journal.pmed.1003039 (PMC7224455; doi:10.1371/journal.pmed.1003039)
Supplement: S1 Table — (DOCX) [file pmed.1003039.s004.docx]

S2 Table: Rate of diagnosis and switching: Mean(sd)

|  | Rate of diagnosis | | Rate of switching | |
| --- | --- | --- | --- | --- |
|  | Mumbai | Patna | Mumbai | Patna |
| Public | 0.09 (0.01) | 0.18 (0.02) | 0.04 (0.00) | 0.01 (0.00) |
| FQ | 0.07 (0.01) | 0.10 (0.02) | 0.04 (0.01) | 0.06 (0.01) |
| LTFQ | 0.03 (0.01) | - | 0.05 (0.01) | 0.14 (0.06) |
| Chemist | - | - | 0.06 (0.01) | 0.12 (0.02) |

We assume that the time to getting a diagnosis from a provider (Td), and switching from a provider (Ts), are exponentially distributed with rates respectively.

Rate of diagnosis is the average number of diagnoses per day per patient in consultation

Rate of switching is the average number of switches per day per patient in consultation
